# Supplementary material for: Elevated CDKN1A (P21) mediates β-thalassemia erythroid apoptosis, but its loss does not improve β-thalassemic erythropoiesis
Source: PubMed Central journal article supplement — Blood Adv. 2023 Sep 9;7(22):6873–85. doi: 10.1182/bloodadvances.2022007655 (PMC10685172; doi:10.1182/bloodadvances.2022007655), 2023-09-09

## SUPPLEMENTAL INFORMATION

### Elevated CDKN1A (P21) mediates $\beta$ -thalassemia erythroid apoptosis but its loss does not improve $\beta$ -thalassemic erythropoiesis

**Authors:** Raymond Liang<sup>1,2@\*</sup>, Miao Lin<sup>1%\*</sup>, Vijay Menon<sup>1§</sup>, Jiajing Qiu<sup>1</sup>, Anagha Menon<sup>1,2</sup>, Laura Breda<sup>3</sup>, Tasleem Arif<sup>1</sup>, Stefano Rivella<sup>3</sup>, and Saghi Ghaffari<sup>1,2,4,5,6#</sup>

**Affiliations:** <sup>1</sup>Department of Cell, Developmental & Regenerative Biology, <sup>2</sup>Developmental and Stem Cell Biology Multidisciplinary Training, Graduate School of Biomedical Sciences, Icahn School of Medicine at Mount Sinai, New York, New York 10029, <sup>3</sup>Children's Hospital of Philadelphia, University of Pennsylvania, Philadelphia, PA 19104, <sup>4</sup>Department of Oncological Sciences, <sup>5</sup>Black Family Stem Cell Institute, <sup>6</sup>Tisch Cancer Institute, Icahn School of Medicine at Mount Sinai, New York, New York 10029

**# Correspondence:** Saghi Ghaffari, M.D.-Ph.D., Department of Cell, Developmental & Regenerative Biology, Icahn School of Medicine at Mount Sinai, New York, NY 10029, Tel: 212-659-8271, Fax: 212-803-6740; e-mail: [Saghi.Ghaffari@mssm.edu](mailto:Saghi.Ghaffari@mssm.edu)

**Running Title:** P21 regulates  $\beta$ -thalassemia erythroid apoptosis

@ Current position: Mnemo Therapeutics, New York, NY

% Current position: University of Rochester, Rochester, NY

§ Current position: Department of Therapeutic Radiology, Yale University, New Haven, CT

\*These authors contributed equally to the work

## Supplemental Figure Legends

**Figure S1: Elevated ROS levels in  $\beta$ -thalassemic erythroid cells.** (A, B) CM-H2DCFDA staining of TER119<sup>+</sup> cells (A) and c-Kit<sup>+</sup> CD71<sup>Hi</sup> TER119<sup>-/Lo/Hi</sup> (B). Results are shown as Mean  $\pm$  SEM; \* $p < 0.05$ .

**Figure S2: Apoptosis in  $\beta$ -thalassemic erythroid cells.** (A) FACS analysis of apoptosis in erythroid cell precursors per gate. (B) Overlays of Annexin V positivity in wild type versus  $\beta$ -thalassemic live erythroid (TER 119<sup>+</sup>) cells per Gate. (C) Quantification of (B); results normalized to wild type in each gate. Results are shown as Mean  $\pm$  SEM; \* $p < 0.05$ , \*\* $p < 0.01$ .

**Figure S3: Upregulation of FOXO3 in  $\beta$ -thalassemic erythroid progenitor cells.** (A) Gating strategy of erythroid progenitors/precursors in c-Kit<sup>+</sup>  $\beta$ -thalassemic vs. WT bone marrow cells. (B) qRT-PCR expression analysis of *Foxo3* in gates I-IV. (C) FOXO3 nuclear localization in *WT* and *Hbb*<sup>th3/+</sup> erythroid progenitors using confocal microscopy; representative images (bottom); quantification of data analyses of at least 40 cells (top). Results are shown as Mean  $\pm$  SEM; \* $p < 0.05$ , \*\* $p < 0.01$ .

**Figure S4: Analyses of TP53 expression in  $\beta$ -thalassemic erythroid progenitor cells.** Representative confocal images of TP53 nuclear localization in *WT* and *Hbb*<sup>th3/+</sup> erythroid progenitors (Top). Quantification of data (bottom). Representative data is shown as Mean  $\pm$  SEM. of at least 30 cells; n.s., not significant.

**Figure S5: FOXO3 mediates apoptosis in  $\beta$ -thalassemic erythroid precursor cells.** (A) Frequency of Annexin V<sup>+</sup> cells in live Gate IV TER119<sup>+</sup> bone marrow cells from *WT*, *Foxo3*<sup>-/-</sup>, *Hbb*<sup>th3/+</sup> and *Foxo3*<sup>-/-</sup>/*Hbb*<sup>th3/+</sup> mice. Results are shown as Mean  $\pm$  SD \* $p < 0.05$  (between *WT* and *Hbb*<sup>th3/+</sup>, # $p < 0.05$  between *Hbb*<sup>th3/+</sup> and *Foxo3*<sup>-/-</sup>/*Hbb*<sup>th3/+</sup>). (B) qRT-PCR expression analysis of *Foxo1* in gates I-IV. Mean  $\pm$  SEM; \*\* $p < 0.01$ .

**Figure S6: Loss of FOXO3 leads to ROS elevation in  $\beta$ -thalassemic erythroid cells.** ROS levels in BM (A) and spleen (B) erythroblast populations. Mean  $\pm$  SEM; \* $p < 0.05$ , \*\* $p < 0.01$  ( $n \geq 3$ ).

**Figure S7: Expression of FOXO3 target PUMA is elevated in  $\beta$ -thalassemic erythroid cells.** (A) Heatmap analysis of RNA-Seq data of apoptosis-related gene cluster in Gates I-III of *WT* and *Foxo3*<sup>-/-</sup> erythroblasts. Heatmap generated using Morpheus software (<https://software.broadinstitute.org/morpheus>). (B) qRT-PCR expression analysis of pro-apoptotic genes *Puma* and *Bim* in *Hbb*<sup>th3/+</sup> and double mutant erythroblasts. Data is shown as Mean  $\pm$  S.E.M; \* $p < 0.05$  between *WT* and *Hbb*<sup>th3/+</sup>; # $p < 0.05$  and ## $p < 0.01$  between *Hbb*<sup>th3/+</sup> and *Foxo3*<sup>-/-</sup>/*Hbb*<sup>th3/+</sup>; \$ $p < 0.05$  between *WT* and *Foxo3*<sup>-/-</sup>/*Hbb*<sup>th3/+</sup>. (C) Western blot analysis of PUMA protein expression in  $\beta$ -thalassemic erythroblasts (top) and quantification (bottom). Mean  $\pm$  SEM; \* $p < 0.05$  ( $n=3$ ).

**Figure S8: Loss of P21 does not improve  $\beta$ -thalassemic erythropoiesis.** (A) Macroscopic examination of spleen from *WT*, *p21<sup>-/-</sup>*, *Hbb<sup>th3/+</sup>*, *p21<sup>-/-</sup>/Hbb<sup>th3/+</sup>*. (B) Spleen weight of *WT*, *p21<sup>-/-</sup>*, *Hbb<sup>th3/+</sup>*, and *p21<sup>-/-</sup>/Hbb<sup>th3/+</sup>* mice from 3 mice per group. (C) Flow cytometric analysis of TER119 in splenocytes; n = 3 for each group. (D) Splenocyte count from *WT*, *p21<sup>-/-</sup>*, *Hbb<sup>th3/+</sup>* and *p21<sup>-/-</sup>/Hbb<sup>th3/+</sup>* mice from 3 mice per group. (E) Total number of bone marrow cells analyzed by flow cytometry, n = 3 for each group. (F) Total live cells within the bone marrow quantified in (E), n = 3 for each group. (G) Flow cytometric analysis of TER119 in the bone marrow, n = 3 for each group. (H) ROS levels in spleen erythroblasts (n = 3 mice /group). (I) Plasma Epo levels (n = 3 mice/group). Mean  $\pm$  SD; \*p < 0.05, \*\*p < 0.01, \*\*\*p < 0.001, \*\*\*\*p < 0.0001.

**Figure S9: Loss of P21 does not improve  $\beta$ -thalassemic erythroid cell maturation.** Histograms showing the percentage of erythroblasts in *WT*, *p21<sup>-/-</sup>*, *Hbb<sup>th3/+</sup>*, *p21<sup>-/-</sup>/Hbb<sup>th3/+</sup>* bone marrow (A), and spleen (B). Mean  $\pm$  SD; \*p < 0.05, \*\*p < 0.01, \*\*\*p < 0.001, \*\*\*\*p < 0.0001

A

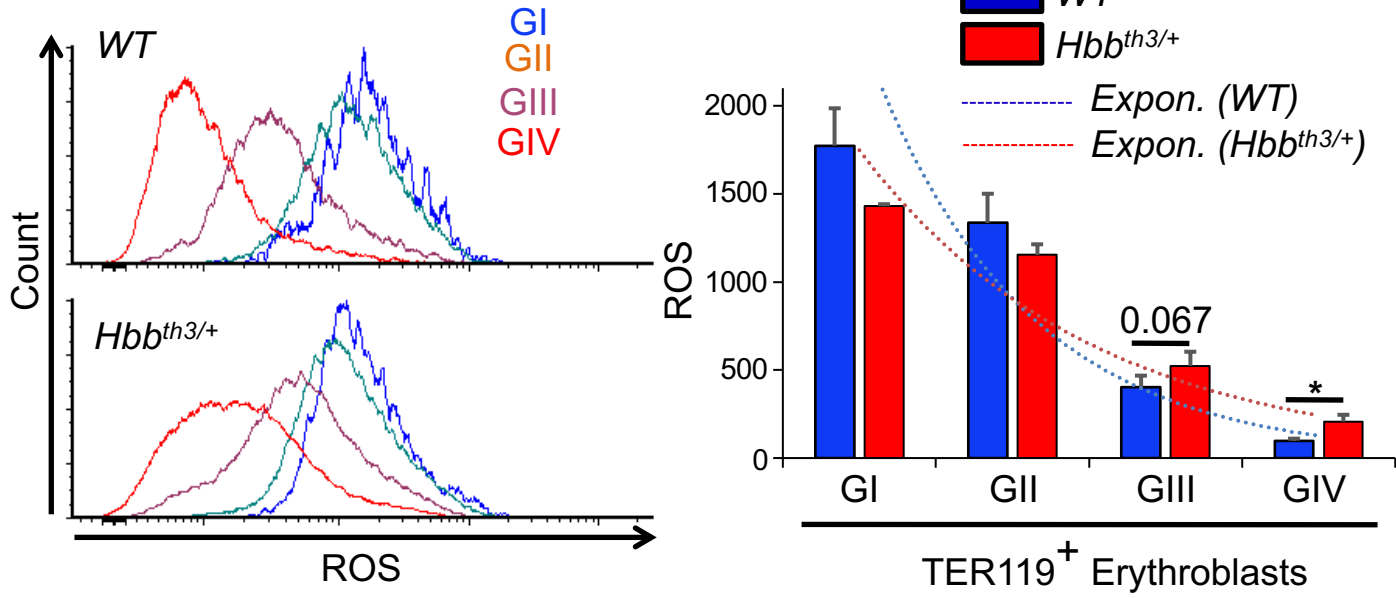

B

Unstained Control

WT

*Hbb<sup>th3/+</sup>*

c-Kit<sup>+</sup> CD71<sup>Hi</sup> TER119<sup>-</sup>

c-Kit<sup>+</sup> CD71<sup>Hi</sup> TER119<sup>Lo</sup>

c-Kit<sup>+</sup> CD71<sup>Hi</sup> TER119<sup>Hi</sup>

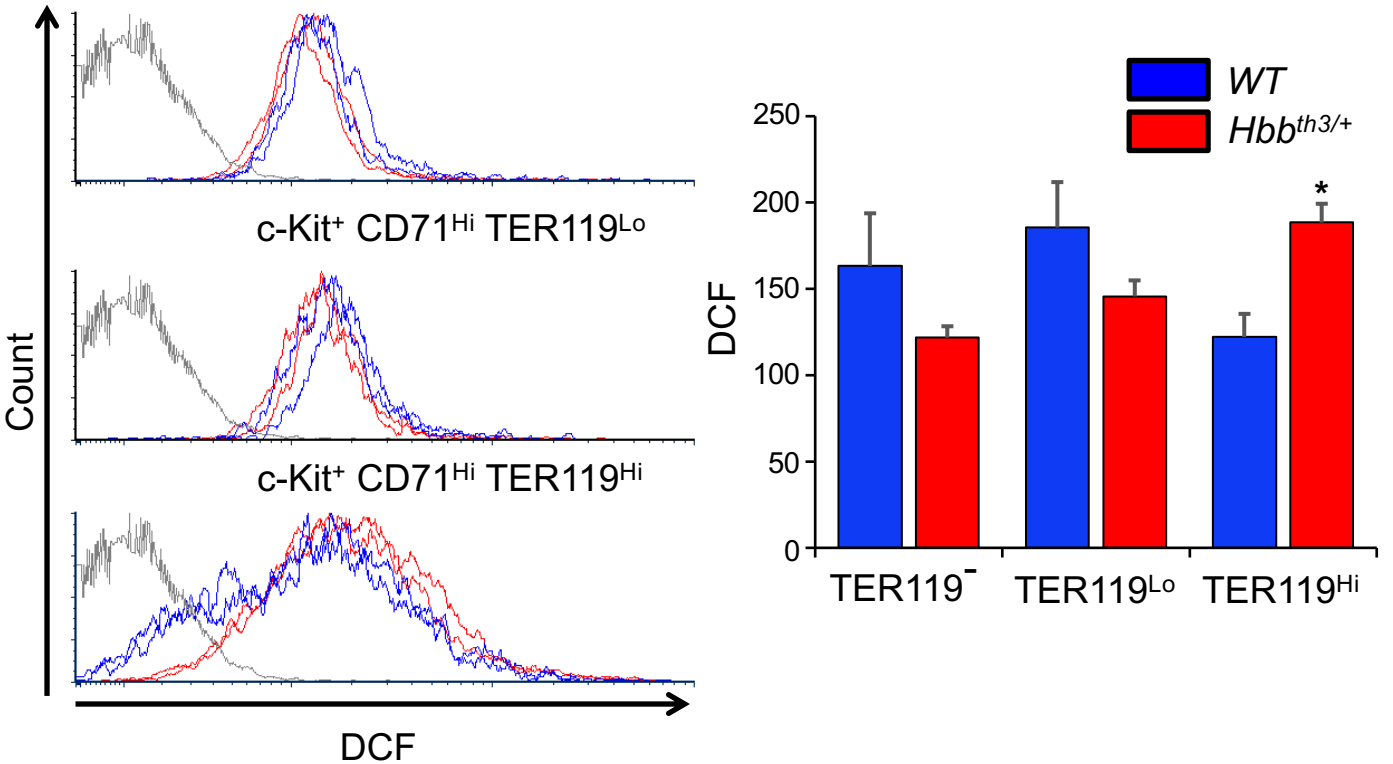

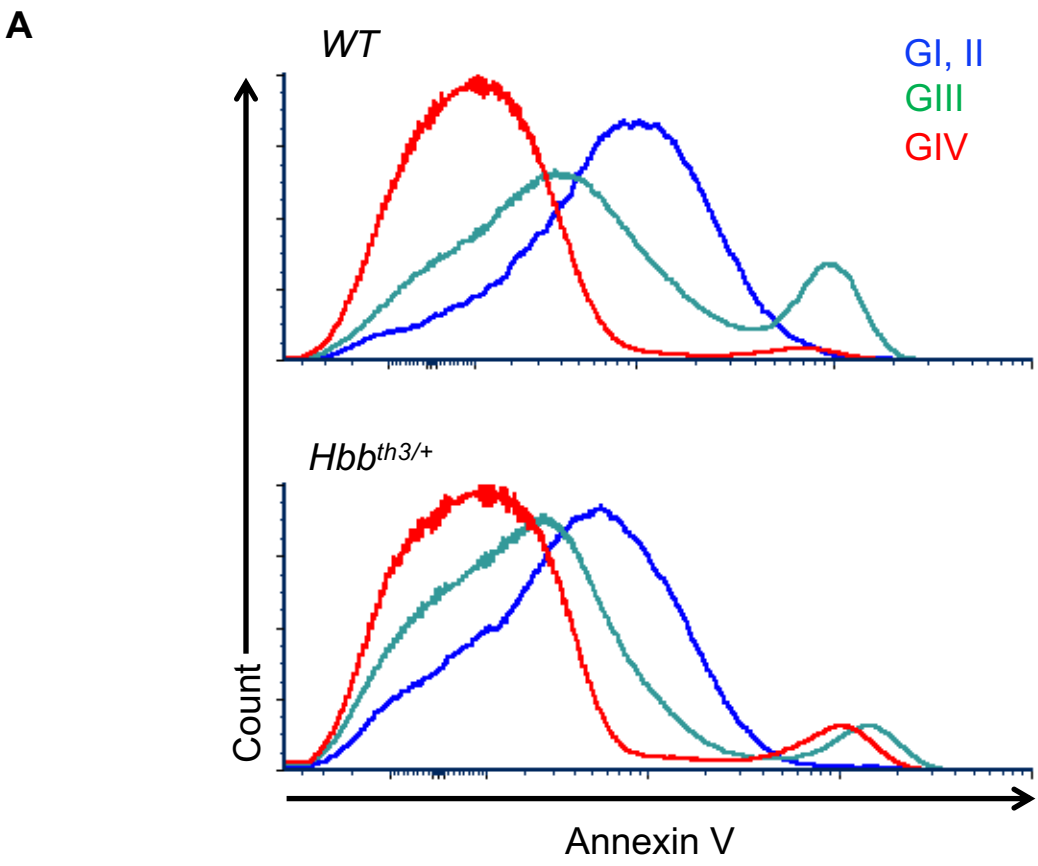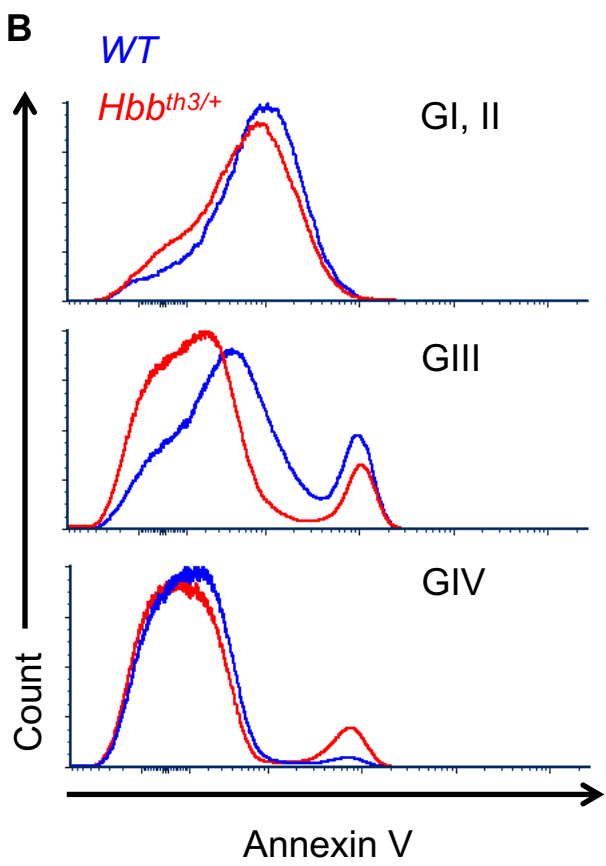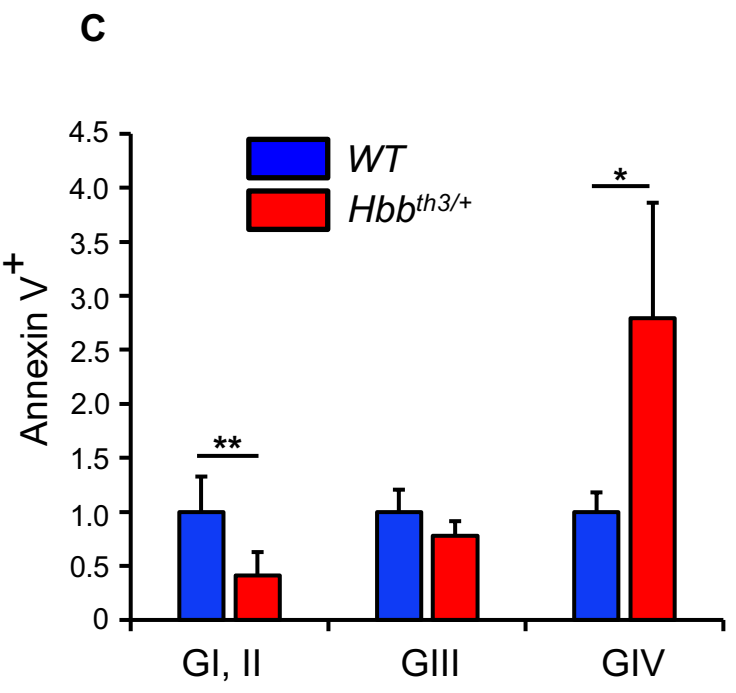

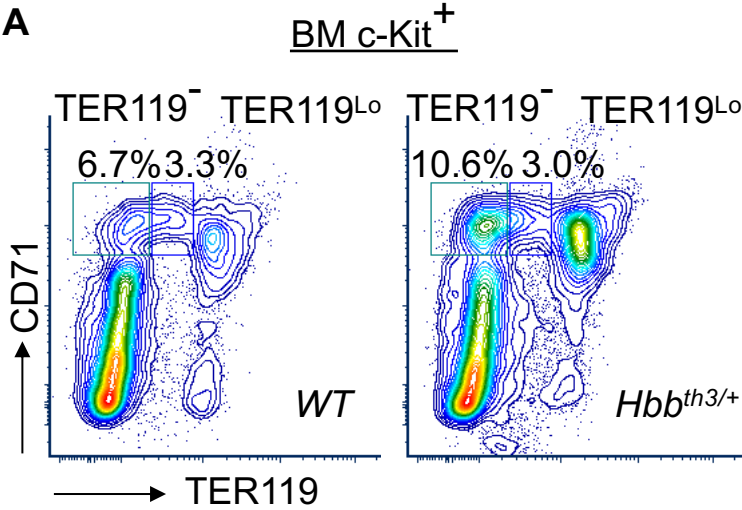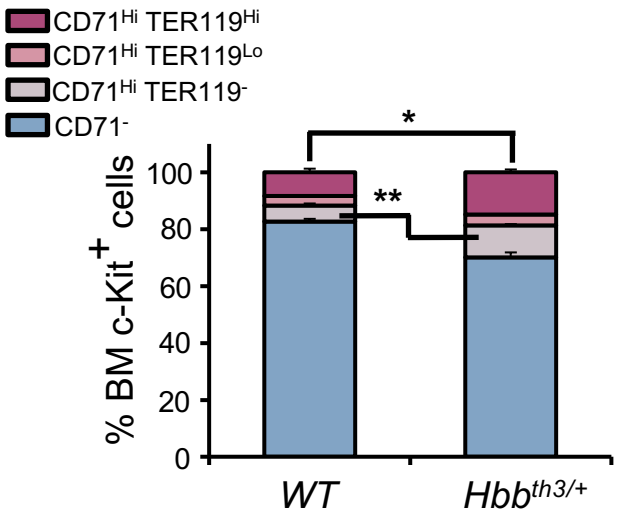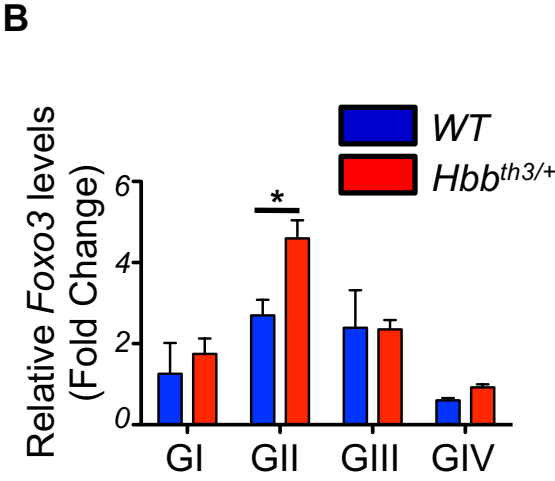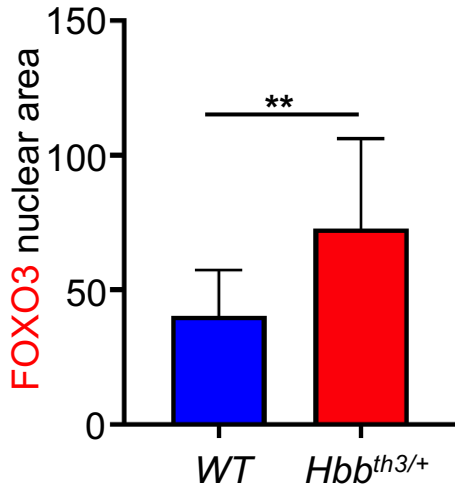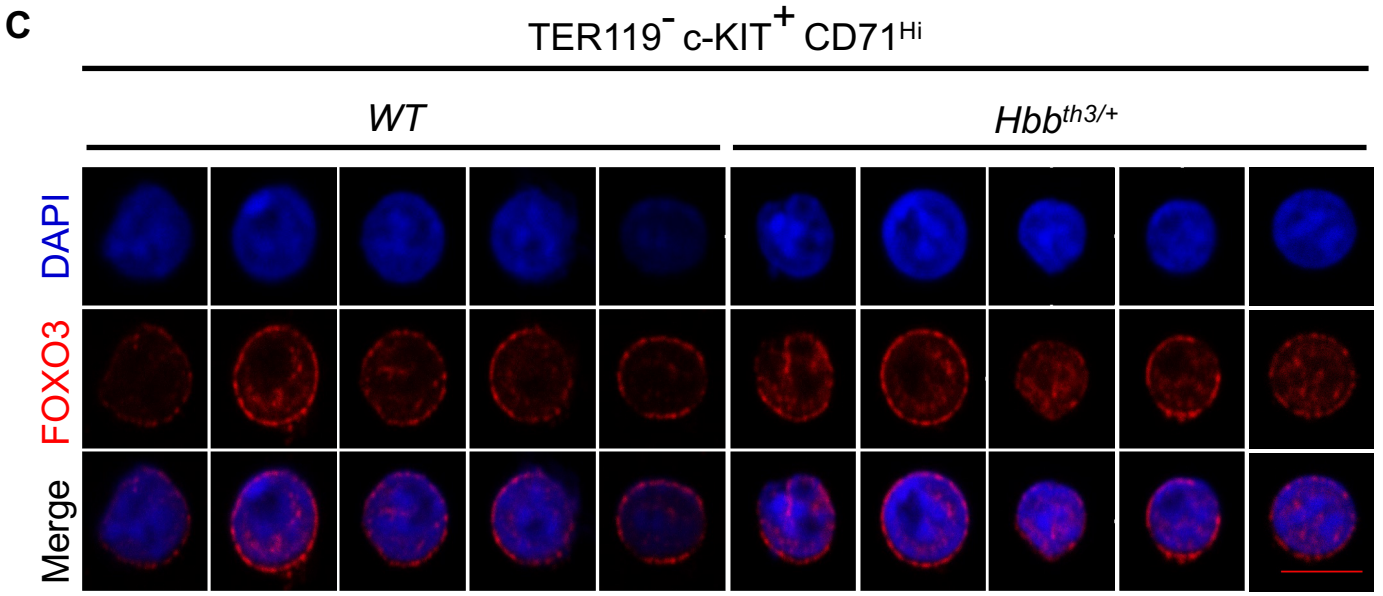

TER119<sup>-</sup> c-KIT<sup>+</sup> CD71<sup>Hi</sup>

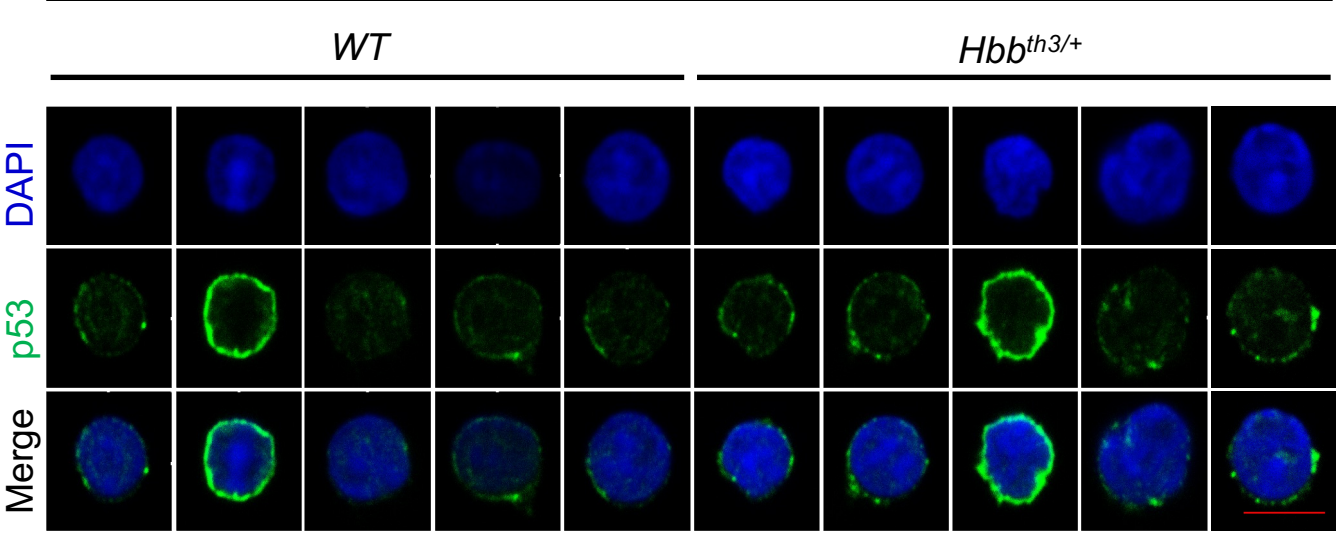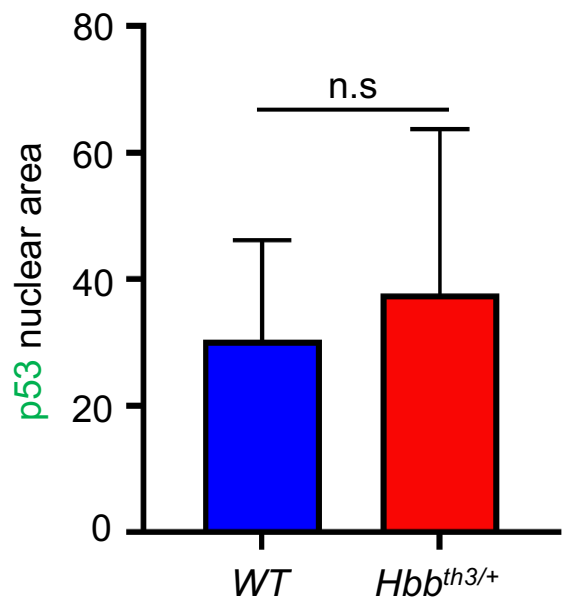

A

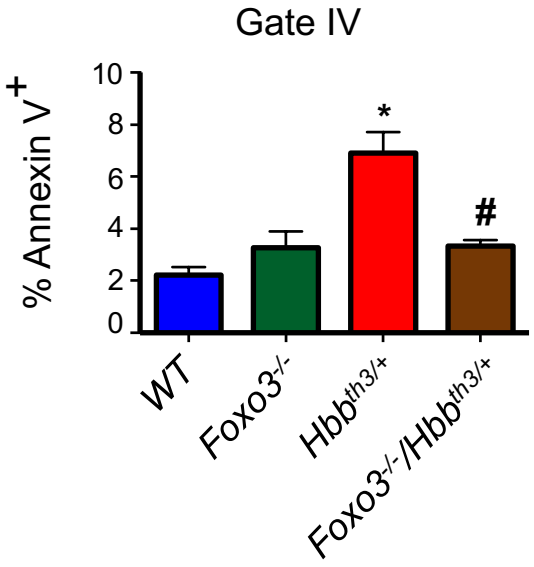

B

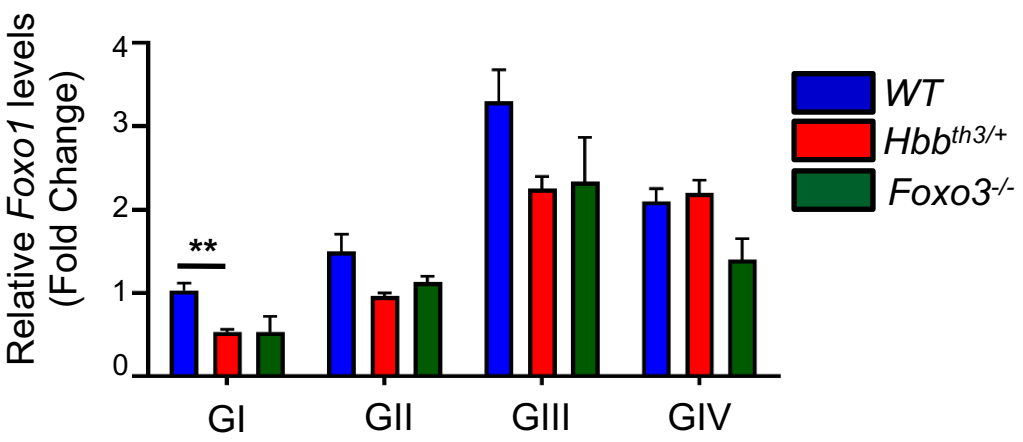



A

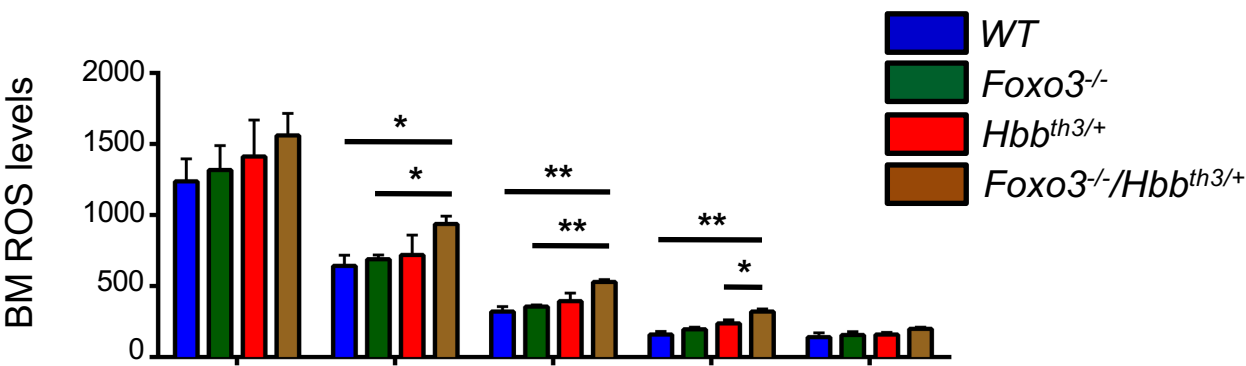

B

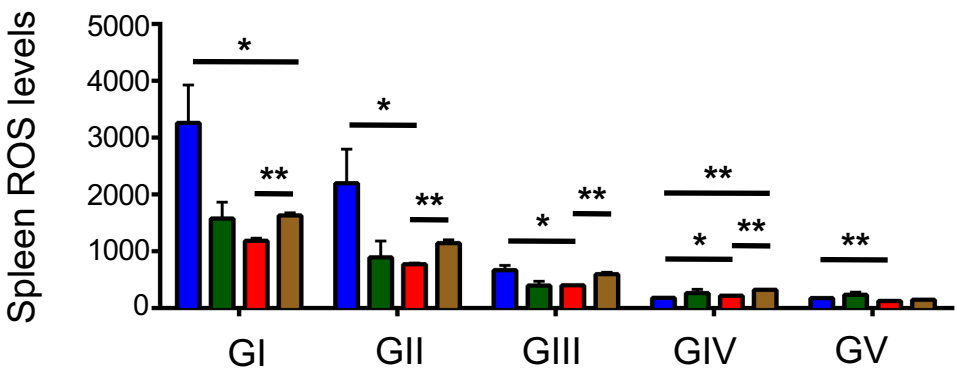

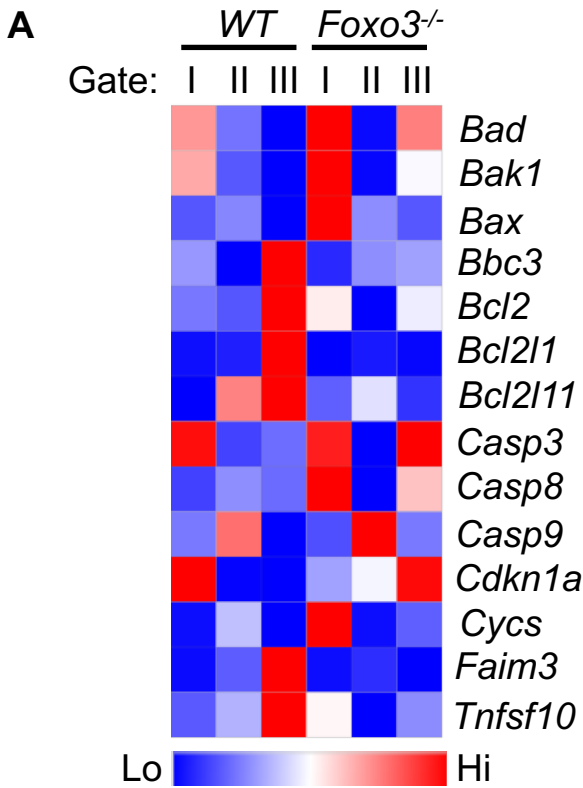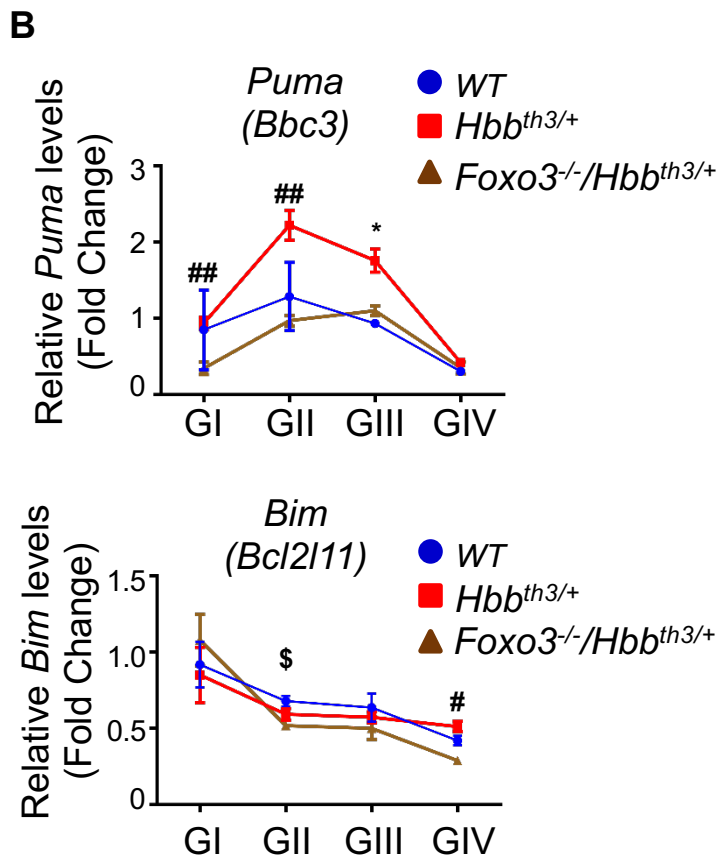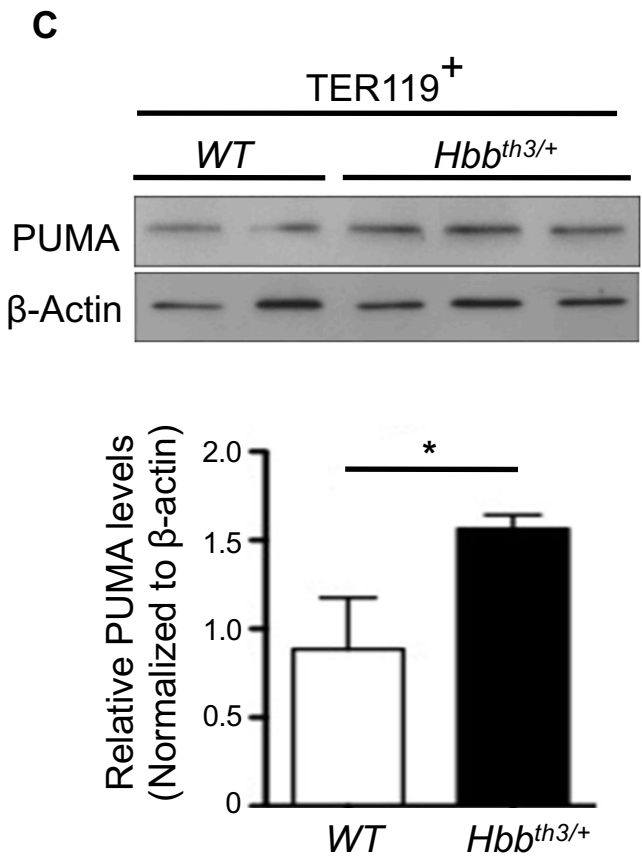

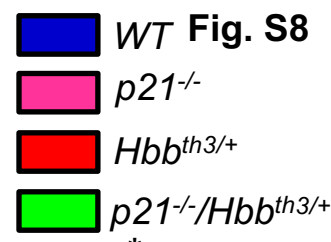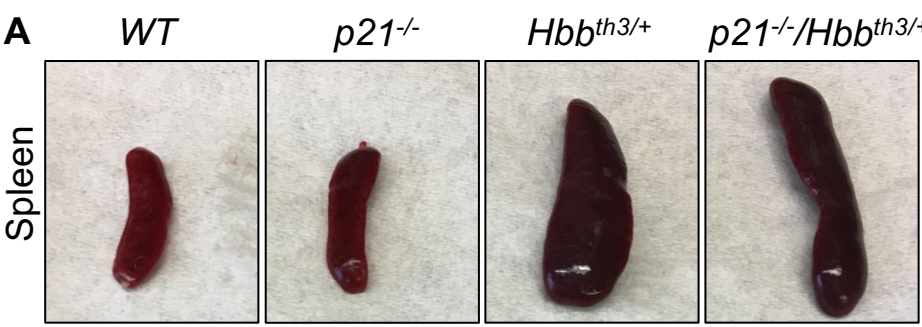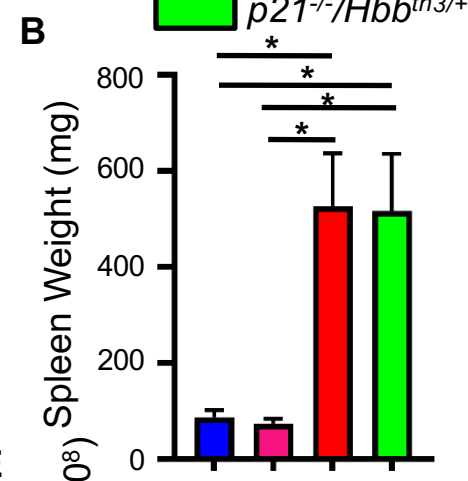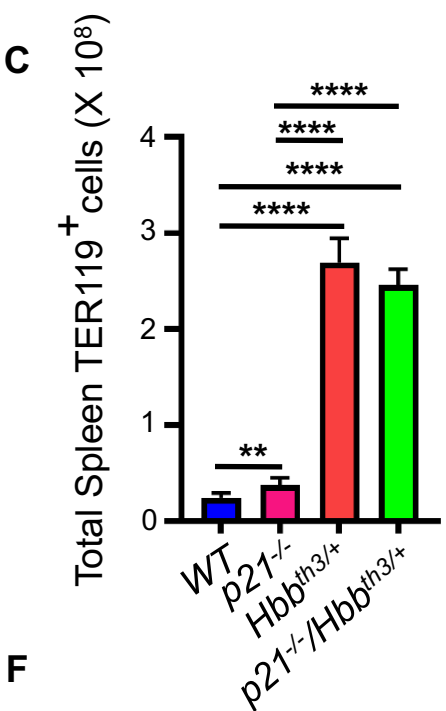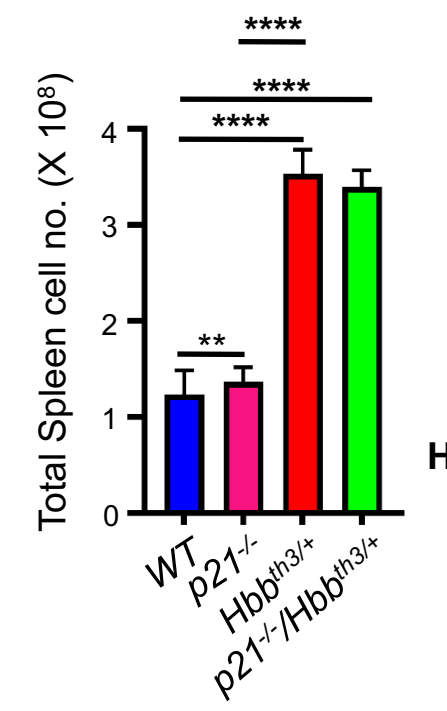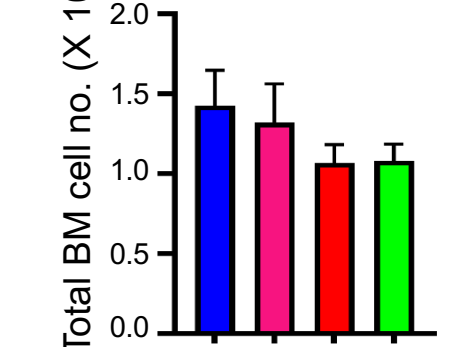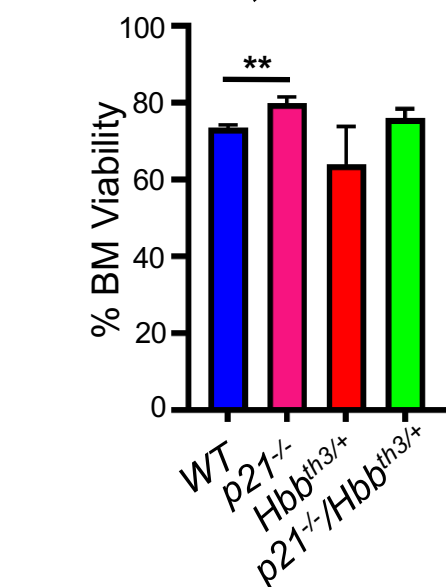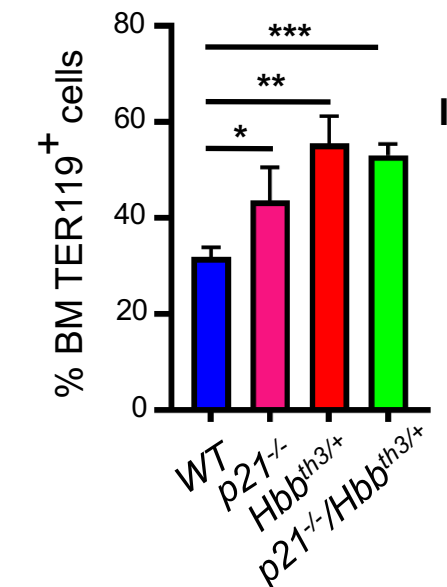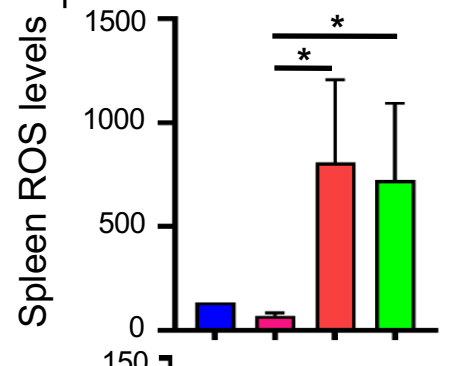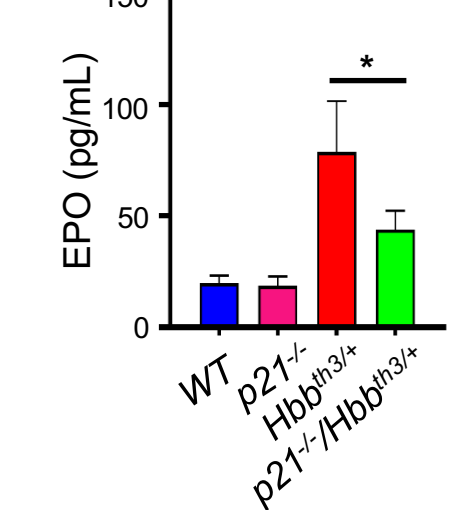

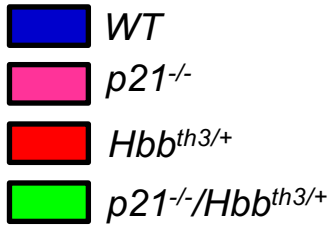

A

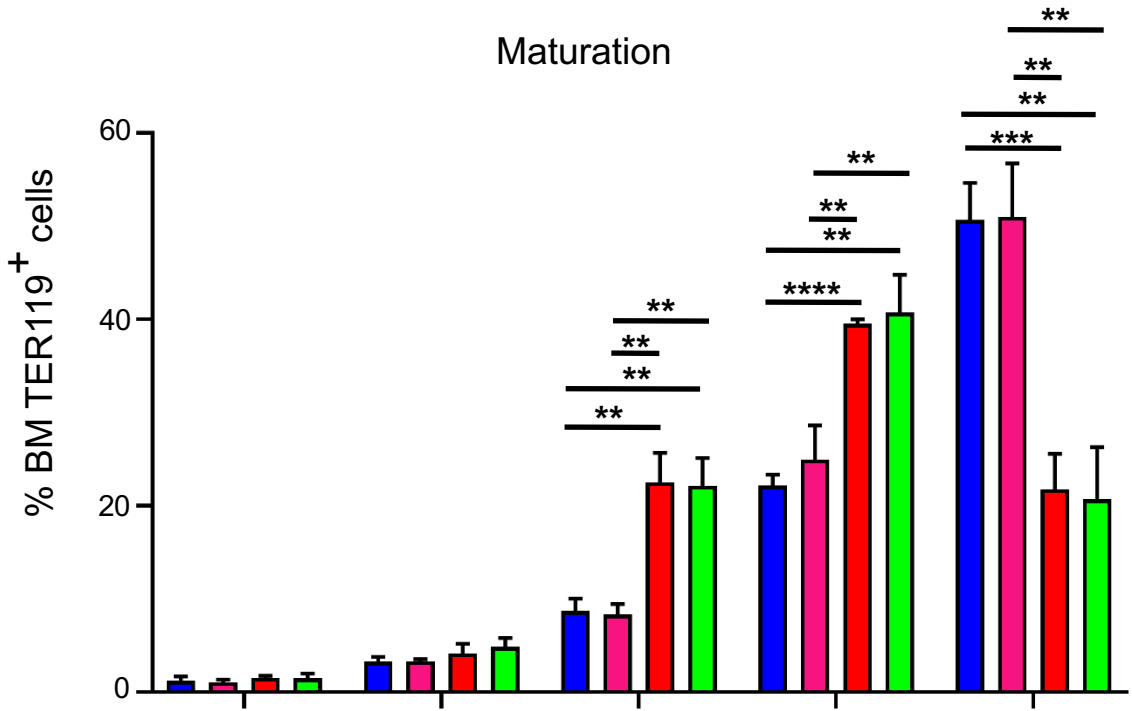

B

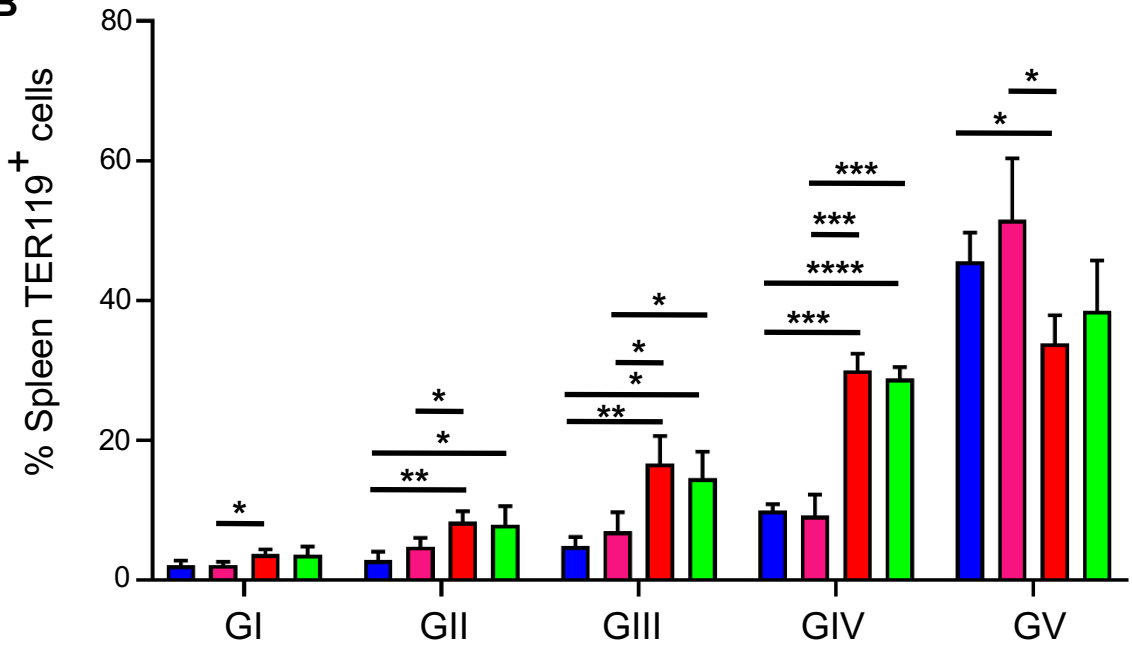

Supplement: BLOODA_ADV-2022-007655-mmc1.pdf [file BLOODA_ADV-2022-007655-mmc1.pdf]
